# Supplementary material for: Mapping the molecular and structural specialization of the skin basement membrane for inter-tissue interactions
Source: PubMed Central journal article supplement (PMC8110968; doi:10.1038/s41467-021-22881-y), 2021-05-10
Supplement: 41467_2021_22881_MOESM3_ESM.pdf [file 41467_2021_22881_MOESM3_ESM.pdf]

## **Description of Additional Supplementary Files**

File Name: Supplementary Data 1

Description: File Name: Supplementary Data 1

Description: Antibodies used in this study, their specific dilutions and tissue fixation methods

File Name: Supplementary Data 2

Description: Consistencies and discrepancies in tissue localization between transcripts and proteins involved in ECMs.

File Name: Supplementary Movie 1

Description: High-resolution three-dimensional reconstruction of the hook basement membrane
